# Supplementary material
Source: PubMed Central journal article supplement (PMC5923150)
Supplement: AAC.01549-17_zac005187134s1.pdf [file AAC.01549-17_zac005187134s1.pdf]

**Supplemental file.**

**Table S1. Primers used for *Cyp51A* site-directed mutagenesis in this study**

| Primer               | Sequence (5' to 3')                          |
|----------------------|----------------------------------------------|
| cyp51A-T960A-Up1S    | ACGTGCGTAGCAAGGGAGAA                         |
| cyp51A-T960A-Up1A    | GCGCTGATGGACGAAGACGTATGCTGACCAGCCATCAACAGG   |
| cyp51A-T960A-Up2S    | CCTGTTGATGGCTGGTCAGCATAACGTCTTCGTCCATCAGCGC  |
| cyp51A-T960A-Up2A    | GTCGTTGCGTCAGTCCAAAACAACACTTCAGGGCCAGTAA     |
| cyp51A-T960A-ptrAs   | TTACTGGCCCTGAAGTGTGTTTTGGACTGACGCAACGAC      |
| cyp51A-T960A-ptrAa   | CCTTCTCGTCTTTGCGTGCCACTTTATGCTTCCGGCTC       |
| cyp51A-T960A-DwS     | GAGCCGGAAGCATAAAGTGGCACGCAAAGACGAGAAGG       |
| cyp51A-T960A-DwA     | CGCTGGGGCGAACATAACC                          |
| cyp51A-T960A-yS      | TTGAATGTATTCCAACGAGCTG                       |
| cyp51A-T960A-yA      | CCTGGGAGAAGAATTGGTCTG                        |
| cyp51A-T1554A-Up1S   | TTTCGGATCGGACGTGGTG                          |
| cyp51A-T1554A-Up1A   | GCTTCATGGGGCCCGAAATGAGGGATGAATAGTCAGTTTCAGG  |
| cyp51A-T1554A-Up2S   | CCTGAAACTGACTATTCATCCCTCATTTTCGGGCCCCATGAAGC |
| cyp51A-T1554A-Up2A   | GTCGTTGCGTCAGTCCAACGTGCCAAGGCCAAGGCT         |
| cyp51A-T1554A-ptrAs  | AGCCTTGGCCTTGGCACGTTGGACTGACGCAACGAC         |
| cyp51A-T1554A-ptrAa  | CACAAAGGGCATATCCCTTCTCCACTTTATGCTTCCGGCTC    |
| cyp51A-T1554A-DwS    | GAGCCGGAAGCATAAAGTGGAGAAGGGATATGCCCTTTGTG    |
| cyp51A-T1554A-DwA    | CAGCAGGCGTATTGGTGAGC                         |
| cyp51A-T1554A-yS     | GGCACGCAAAGACGAGAA                           |
| cyp51A-T1554A-yA     | AAAGAGCACGACCCGACC                           |
| T960A-Up2A-hpgA      | GAGCTCCAGCTTTTGTTCACAACAACACTTCAGGGCCAGTAA   |
| cyp51A-T960A-hpgs    | TTACTGGCCCTGAAGTGTGTTGGAACAAAAGCTGGAGCTC     |
| cyp51A-T960A-hpgAa   | CCTTCTCGTCTTTGCGTGCGTCGACGGTATCGATAAGCTT     |
| T960A-DwS-hpgA       | AAGCTTATCGATACCGTCGACGCACGCAAAGACGAGAAGG     |
| T1554A-Up2A-hpgA     | GAGCTCCAGCTTTTGTTCCTCGTGCCAAGGCCAAGGCT       |
| cyp51A-T1554A--hpgAs | AGCCTTGGCCTTGGCACGGGAACAAAAGCTGGAGCTC        |
| cyp51A-T1554A--hpgAa | CACAAAGGGCATATCCCTTCTCGTCGACGGTATCGATAAGCTT  |
| T1554A-DwS-hpgA      | AAGCTTATCGATACCGTCGACGAGAAGGGATATGCCCTTTGTG  |

**Table S2. Abbreviations of species names.**

| Abbreviation (EPPO code) | Name of pathogen                |
|--------------------------|---------------------------------|
| ASPEFU                   | <i>Aspergillus fumigatus</i>    |
| ASPEFL                   | <i>Aspergillus flavus</i>       |
| ERYSGT                   | <i>Blumeria graminis</i>        |
| MONIFC                   | <i>Monilinia fructicola</i>     |
| MYCOFI                   | <i>Mycosphaerella fijiensis</i> |
| PENIDI                   | <i>Penicillium digitatum</i>    |
| PSDCHE                   | <i>Oculimacula yallundae</i>    |
| PYRNTE                   | <i>Pyrenophora teres</i>        |
| SEPTTR                   | <i>Zymoseptoria tritici</i>     |
| UNCINE                   | <i>Erysiphe necator</i>         |
| VENTIN                   | <i>Venturia inaequalis</i>      |

**Figure S1. Amino acid sequence alignment of the Cyp51 family.** Sequences are named by species EPPO code and NCBI gene accession number. The mutation labels shown above the alignment are based on the position number of the amino acid in Cyp51A sequence from *Aspergillus fumigatus*. Residues highlighted in yellow denote amino acid substitutions associated with fungicide resistance at an orthologous position of *A. fumigatus* (Cyp51A).

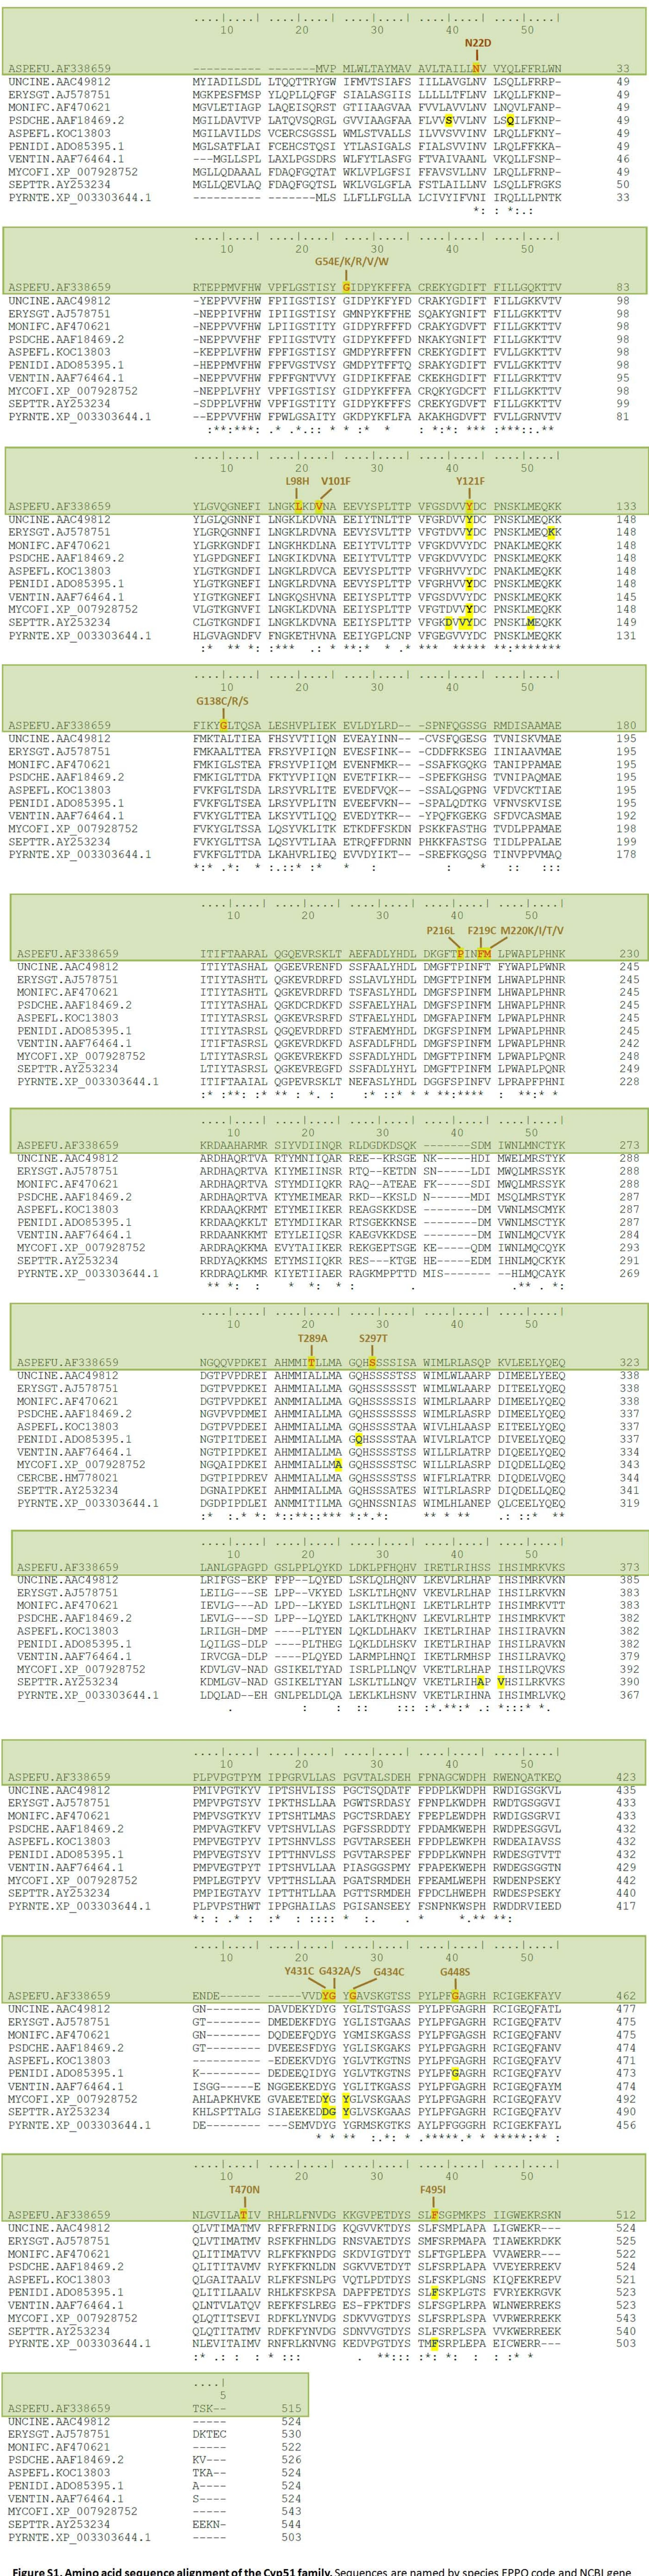

**Figure S1. Amino acid sequence alignment of the Cyp51 family.** Sequences are named by species EPPO code and NCBI gene accession number. The mutation labels shown above the alignment are based on the position number of the amino acid in Cyp51A sequence from *Aspergillus fumigatus*. Residues highlighted in yellow denote amino acid substitutions associated with fungicide resistance at an orthologous position of *A. fumigatus* (Cyp51A).
